# Supplementary material
Source: publisher figshare collection journal article supplement (https://tandf.figshare.com/ndownloader/files/21960279)
Supplement: Supplementary file 1 [file 21960279]

## Reasons for missing observations in shift work, hot flush score and duration of light exposure

### Shift work status (missing proportion = 5%)

Total number of missing observation (n = 5)

- 3 left work force (1 retired, 2 for carer's responsibility)
- 2 lost to follow up

### Hot flush score (missing proportion = 9%)

Total number of missing observations (n = 9)

- 3 left work force (1 retired, 2 for carer's responsibility)
- 3 lost to follow up
- 1 unwell from severe flu
- 1 loss of family member
- 1 initiated HRT for symptoms unrelated to hot flush

### Duration of sunlight exposure (missing proportion = 13%)

Total number of missing observations (n = 13)

- 3 left work force (1 retired, 2 for carer's responsibility)
- 3 lost to follow up
- 1 unwell from severe flu
- 1 loss of family member
- 1 initiated HRT for symptoms unrelated to hot flush
- 1 withdrew, as hot flush naturally resolved
- 3 poor logger data
